# Supplementary material
Source: publisher figshare collection journal article supplement (https://brill.figshare.com/articles/dataset/_/25256995)
Supplement: Supplementary file 1 [file 1]

# **First detailed report of cooperative breeding in red-billed blue magpie (*Urocissa erythrorhyncha*) in central China**

**Weibin Guo<sup>1,\*</sup>, Buge Lin<sup>2,\*</sup>, Zhiqing Hu<sup>2,\*</sup>, Hanqing Cao<sup>2</sup>, and  
Changcao Wang<sup>2,\*\*</sup>**

<sup>1</sup> School of Life Sciences, Jinggangshan University, Ji'An, 343009, Jiangxi, China

<sup>2</sup> State Key Laboratory of Biocatalysis and Enzyme Engineering, School of Life Sciences, Hubei, 430062, China

\*These authors contributed equally to this work.

\*\*Corresponding author; wchangcao@163.com

## **Supplementary material**

**Video S1.** In one cooperative-breeding unit with three adults, all the members devote to deliver food to nestlings.
